# Supplementary material
Source: publisher site journal article supplement (https://www.dovepress.com/article/579250)
Supplement: Supplementary file 1 [file 579250%20Supplementary%20Material_1.docx]

**Supplementary Material 1:** Overall treatment effects

Overall, the 28 patients showed improved BCVA (*p* = 0.03) and reduced CMT (*p* = 0.0002) post treatment compared to baseline (**Supplementary Figure 1A)**. Of the 28 patients, 17 had both pre- and post-treatment ultra-widefield fluorescein angiography (UWF-FA), allowing an exploratory analysis of pre- vs post- treatment UWF-FA measures. This analysis revealed a significant reduction in peripheral BRB leakage (*p* = 0.019), with no significant change in central BRB leakage (*p* = 0.177; **Supplementary Figure 1B**). No significant changes were found in perfusion and blood flow (*p* > 0.05; n = 14; **Supplementary Figure 1B**). Perfusion and blood flow analysis were performed on 14 eyes, as three follow-up UWF-FAs had insufficient images between the choroidal flush and arteriovenous phases for accurate calculation. This exploratory analysis highlights the overall positive effect of anti-VEGF treatment on BCVA, CMT, and peripheral BRB leakage, and the lack of an effect on perfusion or blood flow.


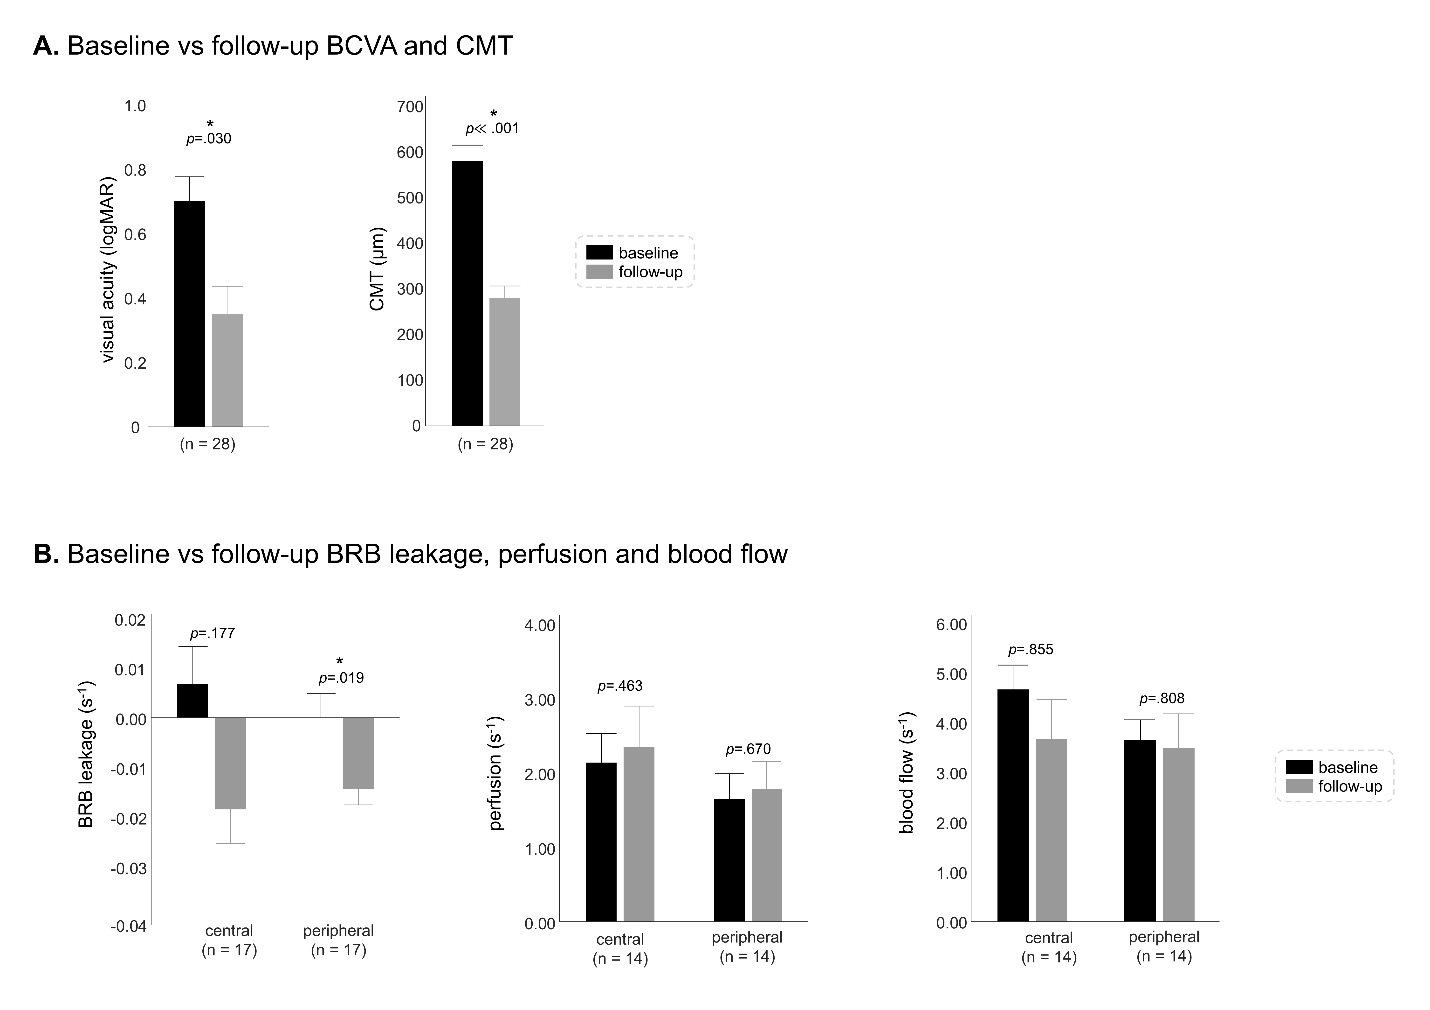


**Supplementary Figure 1**: Overall effects of treatment. A) Visual acuity saw a significant improvement from 0.75 ± 0.02 logMAR at baseline to 0.45 ± 0.02 logMAR at follow-up (+15 ETDRS letters; p=.04). Similarly, CMT saw a significant reduction from 585 ± 8 µm at baseline to 292 + 6 µm at follow-up (p<.001). B) Peripheral BRB leakage saw a significant reduction (p = 0.019), with no significant change in central BRB leakage (p = 0.177). No significant changes were noted in perfusion and blood flow in any of the five regions. All bar chart values are reported in median ± standard error of the median. Statistical significance was determined at a p-value < .05 and is indicated by a bold asterisk (*). BRB: blood-retina barrier; CMT: central macular thickness.
